# Supplementary material
Source: PubMed Central journal article supplement (PMC2359862)
Supplement: rsif20060182s04.pdf [file rsif20060182s04.pdf]

## Supplemental Information

**Table 1. Distribution of marker compounds characteristic of individuals**

| Individual compounds                                               | % subjects in which<br>compound occurred in no (0)<br>to all 5 samples |    |    |    |    |    | % subjects<br>found in $\geq$<br>1 sample* |
|--------------------------------------------------------------------|------------------------------------------------------------------------|----|----|----|----|----|--------------------------------------------|
|                                                                    | 0                                                                      | 1  | 2  | 3  | 4  | 5  |                                            |
| <b>Alcohols and Phenols</b>                                        |                                                                        |    |    |    |    |    |                                            |
| 2-phenylethanol *                                                  | 73                                                                     | 16 | 8  | 2  | 0  | 1  | 27                                         |
| $\alpha$ -terpineol *                                              | 92                                                                     | 6  | 1  | 1  | 1  | 0  | 8                                          |
| geraniol *                                                         | 86                                                                     | 10 | 2  | 2  | 1  | 1  | 14                                         |
| eugenol *                                                          | 82                                                                     | 11 | 3  | 3  | 1  | 1  | 18                                         |
| isoeugenol *                                                       | 68                                                                     | 21 | 8  | 3  | 1  | 0  | 32                                         |
| 1-tridecanol *                                                     | 78                                                                     | 9  | 7  | 2  | 3  | 1  | 22                                         |
| <b>Aldehydes</b>                                                   |                                                                        |    |    |    |    |    |                                            |
| geranial *                                                         | 58                                                                     | 18 | 18 | 4  | 1  | 1  | 42                                         |
| undecanal *                                                        | 9                                                                      | 24 | 30 | 25 | 11 | 1  | 91                                         |
| tridecanal *                                                       | 30                                                                     | 35 | 23 | 10 | 2  | 0  | 70                                         |
| lilial                                                             | 3                                                                      | 14 | 13 | 14 | 26 | 30 | 97                                         |
| <b>Ketones</b>                                                     |                                                                        |    |    |    |    |    |                                            |
| jasmone                                                            | 94                                                                     | 4  | 1  | 0  | 0  | 1  | 6                                          |
| $\alpha$ -ionone *                                                 | 74                                                                     | 14 | 6  | 4  | 2  | 1  | 26                                         |
| benzophenone *                                                     | 6                                                                      | 18 | 24 | 26 | 18 | 9  | 94                                         |
| 2-acetyl-3,5,5,6,8,8-hexa-methyl-<br>5,6,7,8-tetrahydronaphthalene | 63                                                                     | 20 | 10 | 3  | 3  | 1  | 37                                         |
| 7-acetyl-6-ethyl-1,1,4,4-<br>tetramethyltetrahydro (Musk 36A)      | 91                                                                     | 5  | 3  | 2  | 0  | 0  | 9                                          |
| <b>Esters</b>                                                      |                                                                        |    |    |    |    |    |                                            |
| $\alpha$ -terpineyl acetate *                                      | 86                                                                     | 10 | 2  | 3  | 1  | 0  | 14                                         |
| methyl N-methylantranilate                                         | 87                                                                     | 8  | 3  | 1  | 1  | 1  | 13                                         |
| 2-hexyl 2-pentenoate                                               | 84                                                                     | 10 | 3  | 3  | 1  | 1  | 16                                         |
| E-cinnamyl acetate                                                 | 84                                                                     | 10 | 3  | 3  | 1  | 1  | 16                                         |

|                                          |    |    |    |    |    |    |    |
|------------------------------------------|----|----|----|----|----|----|----|
| $\alpha$ -trichloromethyl-benzyl acetate | 94 | 4  | 1  | 0  | 1  | 1  | 6  |
| isoeugenol acetate                       | 77 | 14 | 4  | 4  | 1  | 1  | 23 |
| methylcis-dihydrojasmonate               | 10 | 18 | 21 | 15 | 24 | 13 | 90 |
| 3Z-1-hexenyl salicylate                  | 84 | 11 | 4  | 2  | 1  | 0  | 16 |
| ethyl tetradecanoate *                   | 73 | 14 | 7  | 3  | 2  | 2  | 27 |
| 2-ethylhexyl salicylate                  | 77 | 11 | 6  | 5  | 1  | 1  | 23 |
| ethyl pentadecanoate                     | 81 | 10 | 5  | 3  | 1  | 1  | 19 |
| 2-phenylethyl phenylacetate              | 72 | 14 | 6  | 3  | 4  | 1  | 28 |
| decyl octanoate                          | 97 | 2  | 1  | 0  | 1  | 1  | 3  |
| dodecyl hexanoate                        | 98 | 0  | 1  | 0  | 1  | 0  | 2  |
| ethyl heptadecanoate                     | 84 | 12 | 4  | 1  | 1  | 0  | 16 |
| a branched dodecyl benzoate              | 93 | 4  | 1  | 2  | 0  | 0  | 7  |
| dodecyl octanoate                        | 69 | 15 | 7  | 2  | 3  | 6  | 31 |
| dodecyl benzoate                         | 36 | 20 | 19 | 12 | 11 | 1  | 64 |
| tridecyl benzoate                        | 69 | 19 | 6  | 4  | 2  | 1  | 31 |
| tetradecyl octanoate                     | 96 | 2  | 1  | 1  | 1  | 0  | 4  |
| tetradecyl benzoate                      | 95 | 4  | 0  | 0  | 2  | 0  | 5  |
| <b>Hydrocarbons</b>                      |    |    |    |    |    |    |    |
| a propyl substituted dodecane            | 71 | 15 | 10 | 3  | 2  | 1  | 29 |
| 4-phenyltridecane                        | 88 | 8  | 2  | 2  | 1  | 0  | 12 |
| 3-methyloctadecane                       | 98 | 1  | 1  | 1  | 0  | 0  | 2  |
| 3-methyl nonadecane                      | 98 | 1  | 0  | 1  | 0  | 0  | 2  |
| <b>Other</b>                             |    |    |    |    |    |    |    |
| 4-sec-butylaniline                       | 93 | 6  | 1  | 0  | 1  | 0  | 7  |
| diphenyl ether                           | 94 | 5  | 0  | 0  | 1  | 0  | 6  |
| an unknown bicyclic compound             | 74 | 14 | 7  | 2  | 2  | 1  | 26 |
| a diethyl acetal                         | 48 | 14 | 16 | 10 | 8  | 4  | 52 |

\* Percent of subjects the compound was found in at least one sample. The average number of subjects these compounds were detected in at least once is 43, the maximum number of subjects is 192, and the minimum 3.

**Table 2. 118 Additional compounds identified from axillary samples**

| <b>RT (min)</b>  | <b>Identification</b>             |
|------------------|-----------------------------------|
| <b>Alcohols</b>  |                                   |
| 12.47            | $\gamma$ -terpineol               |
| 12.90            | 2-phenoxyethanol                  |
| 13.34            | citronellol                       |
| 26.83            | pentadecanol                      |
| 27.75            | a hexadecadienol                  |
| 29.51            | hexadecanol                       |
| <b>Aldehydes</b> |                                   |
| 12.74            | decanal                           |
| 13.93            | p-anisaldehyde                    |
| 15.46            | undecanal                         |
| 18.10            | dodecanal                         |
| 23.00            | tetradecanal                      |
| 23.58            | pentylcinnamaldehyde              |
| 26.04            | E-2-hexylcinnamaldehyde           |
| 28.09            | hexadecanal                       |
| <b>Ketones</b>   |                                   |
| 8.98             | acetophenone                      |
| 9.49             | 2-nonanone                        |
| 14.99            | 2-undecanone                      |
| 15.42            | an isopropylacetophenone          |
| 17.69            | 2-dodecanone                      |
| 19.45            | $\gamma$ -irone                   |
| 19.66            | $\beta$ -ionone                   |
| 20.22            | 2-tridecanone                     |
| 20.54            | Z- $\alpha$ -irone                |
| 22.52            | 2-tetradecanone                   |
| 24.08            | 1-ethyl-3-methyl- $\beta$ -ionone |

24.92 2-pentadecanone

27.54 2-hexadecanone

---

**Amines**

---

12.65 2-pentylpyrrole

13.28 2-phenoxyethylmethylamine

15.19 an aliphatic amine

16.34 nicotine

16.81 4-sec-butylaniline

20.37 N,N-dimethyl-1-dodecylamine

30.24 N,N-dimethyl-1-hexadecylamine

35.88 N,N-dimethyl-1-octadecylamine

---

**Amides**

---

17.18 methyl N,N-diethylthiocarbamate

18.04 a hydroxy acetanilide

21.98 n-propylbenzamide

---

**Carboxylic acids**

---

12.24 octanoic acid

14.76 nonanoic acid

21.03 8-methylundecanoic acid

21.90 dodecanoic acid

22.80 a methyl dodecanoic acid

23.18 9-methyldodecanoic acid

25.74 10-methyltridecanoic acid

26.80 myristic acid (tetradecanoic acid)

28.36 a methyltetradecanoic acid

28.65 a methyltetradecanoic acid

28.84 9-pentadecenoic acid

29.31 pentadecanoic acid

30.76 a methylpentadecanoic acid

31.70 9-hexadecenoic acid

32.49-33.00 palmitic acid (hexadecanoic acid)

|       |                                  |
|-------|----------------------------------|
| 34.37 | 9-heptadecenoic acid             |
| 37.31 | oleic acid                       |
| 38.03 | stearic acid (octadecanoic acid) |

---

**Lactones**

---

|       |                          |
|-------|--------------------------|
| 12.27 | $\gamma$ -heptanolactone |
| 16.70 | $\gamma$ -nonanolactone  |
| 18.60 | coumarin                 |

---



---

**Esters**

---

|       |                                    |
|-------|------------------------------------|
| 11.40 | benzyl acetate                     |
| 12.07 | 2-phenylethyl acetate              |
| 12.73 | dihydromyrcenol acetate            |
| 14.82 | cis-2-tert-butylcyclohexyl acetate |
| 16.43 | citronellol acetate                |
| 16.62 | neryl acetate                      |
| 17.16 | geranyl acetate                    |
| 21.95 | pentyl salicylate                  |
| 22.21 | isooctanedioldibutyrate            |
| 23.30 | isopropyl dodecanoate              |
| 24.46 | 1-hexyl salicylate                 |
| 25.01 | methyl trans-jasmonate             |
| 25.73 | a hexenyl salicylate               |
| 26.65 | benzyl benzoate                    |
| 28.23 | a branched isopropyl hexadecanoate |
| 30.93 | methyl palmitate                   |
| 32.40 | hexyl dodecanoate                  |
| 32.99 | ethyl hexadecanoate                |
| 33.70 | isopropyl hexadecanoate            |
| 37.35 | 2-ethyl-hexyl 4-methoxycinnamate   |

---

---

**Hydrocarbons**

---

|       |                             |
|-------|-----------------------------|
| 7.67  | p-cymene                    |
| 12.26 | 1-dodecene                  |
| 12.50 | dodecane                    |
| 15.15 | tridecane                   |
| 17.55 | 1-tetradecene               |
| 17.77 | tetradecane                 |
| 18.22 | $\beta$ -caryophyllene      |
| 19.72 | trans-muurolo-4(14),5-diene |
| 19.96 | a methyl biphenyl           |
| 20.02 | a methyl biphenyl           |
| 20.36 | $\alpha$ -farnesene         |
| 20.38 | pentadecane                 |
| 21.77 | 4-methylpentadecane         |
| 22.56 | hexadecane                  |
| 23.28 | 5-phenylundecane            |
| 23.53 | 4-phenylundecane            |
| 23.99 | 3-phenylundecane            |
| 24.94 | 2-phenylundecane            |
| 25.04 | heptadecane                 |
| 25.49 | 6-phenyldodecane            |
| 25.66 | a sesquiterpene             |
| 25.77 | 5-phenyldodecane            |
| 27.48 | octadecane                  |
| 27.57 | 2-phenyldodecane            |
| 28.09 | 6-phenyltridecane           |
| 29.40 | 3-phenyltridecane           |
| 30.13 | 1-nonadecene                |
| 30.22 | nonadecane                  |
| 30.38 | 2-phenyltridecane           |

|       |                                       |
|-------|---------------------------------------|
| 32.93 | eicosane (C-20 linear hydrocarbon)    |
| 35.79 | heneicosane (C-21 linear hydrocarbon) |
| 38.79 | docosane (C-22 linear hydrocarbon)    |
| 41.49 | tricosane (C-23 linear hydrocarbon)   |
| 43.44 | tetracosane (C-24 linear hydrocarbon) |

---

**Esters and steroids**

---

|       |                       |
|-------|-----------------------|
| 24.43 | dioctylether          |
| 29.26 | bis(benzyloxy)methane |
| 31.75 | an androgen steroid   |
| 37.39 | an androgen steroid   |
| 42.01 | an androgen steroid   |

---

Figure 1

GC-MS profiles of skin volatile compounds

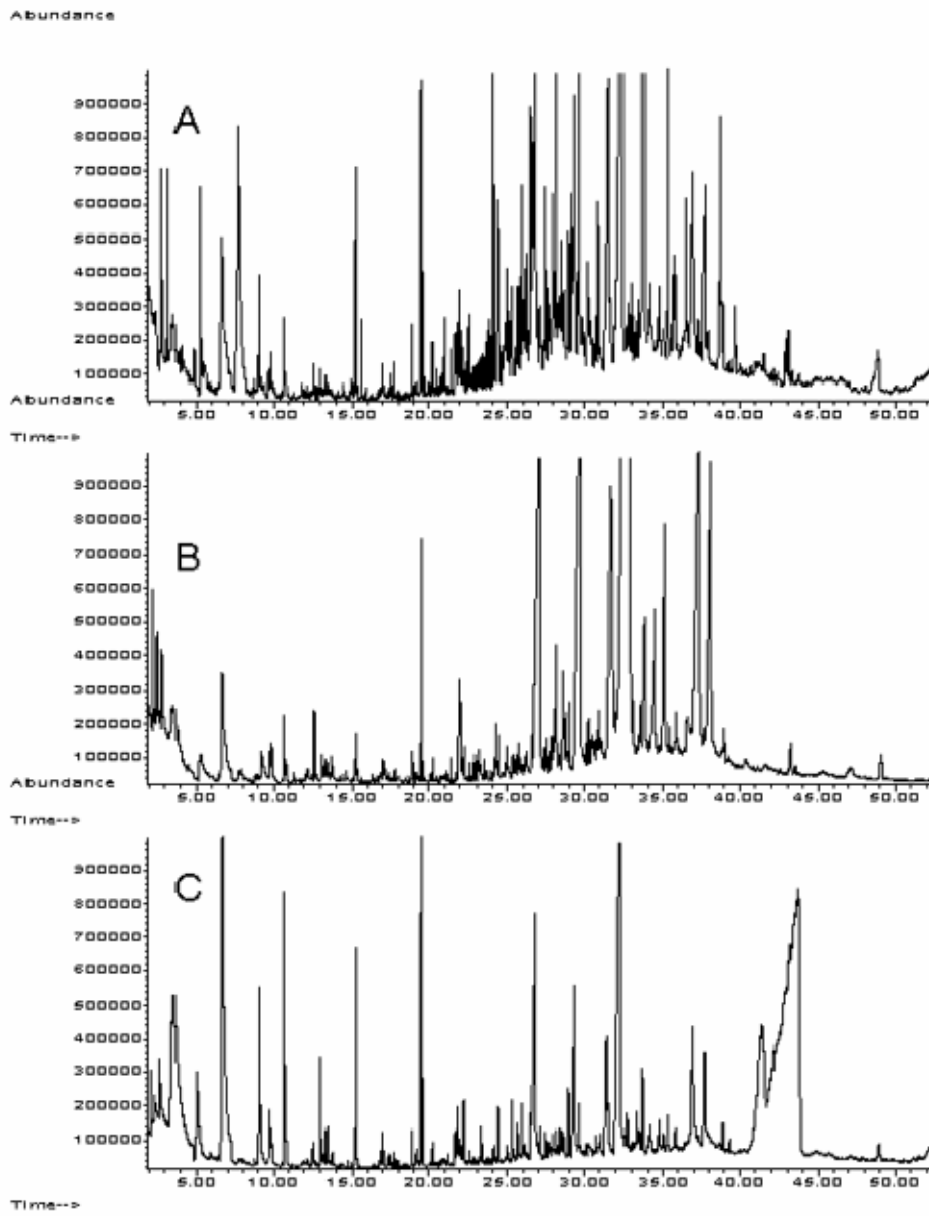

A: D90 female, B: P219 male, C: B57 male
